# Supplementary material
Source: PubMed Central journal article supplement (PMC10391062)

## **SUPPLEMENTARY MATERIALS**

**SUPPLEMENTARY TABLE 1** Objective adherence rates for injectable DMTs

**SUPPLEMENTARY TABLE 2** Objective adherence rates for oral DMTs

**SUPPLEMENTARY TABLE 3** Discontinuation rates for oral and injectable DMTs

**SUPPLEMENTARY TABLE 4** Appraisal tool for cross-sectional studies (AXIS) for included objective studies

**SUPPLEMENTARY TABLE 5** Sensitivity analysis to check effect of excluding studies with highest weights in meta-analyses

**SUPPLEMENTARY FIGURE 1** Forest plot showing pooled estimates for the proportion of sample oral and injectable DMTs showing adherence of more than 80%, with separate subgroups for MPR and PDC

**SUPPLEMENTARY FIGURE 2** Doi plot showing major asymmetry between all studies

SUPPLEMENTARY TABLE 1 Objective adherence rates for injectable DMTs

| Author,<br>year                    | DMT(s)                                     | Sample<br>size                              | Adherenc<br>e measure          | Adherence: Cut-off score ( $\geq 80$ unless specified) |           |           |               | Adherence:                                              |                                                                       |
|------------------------------------|--------------------------------------------|---------------------------------------------|--------------------------------|--------------------------------------------------------|-----------|-----------|---------------|---------------------------------------------------------|-----------------------------------------------------------------------|
|                                    |                                            |                                             |                                | <8 months                                              | 12 months | 24 months | >36<br>months | <8 months                                               | 12 months                                                             |
| Agashiva<br>la, 2013 <sup>41</sup> | IFN $\beta$ -1b,<br>IFN $\beta$ -1a,<br>GA | <i>n</i> =1,64<br>3                         | MPR,<br>PDC                    |                                                        |           |           |               | <b>MPR:</b><br><b>(<math>\geq 80</math>):</b><br>77.4%; | <b>MPR:</b><br><i>M</i> =0.87,<br><i>SD</i> =0.16;                    |
|                                    |                                            |                                             |                                |                                                        |           |           |               | <b>PDC</b><br><b>(<math>\geq 80</math>):</b><br>49.9%   | <b>PDC:</b><br><i>M</i> =0.68,<br><i>SD</i> =0.31                     |
| Bayas,<br>2015 <sup>37</sup>       | IFN $\beta$ -1a<br>s.c.                    | <i>N</i> =912<br>(safety<br>populat<br>ion) | Electronic<br>Autoinject<br>or |                                                        |           |           |               | <b>Autoinject</b><br><b>or (&gt;95):</b><br>84.3%;      | <b>Autoinject</b><br><b>or:</b><br><i>M</i> =0.97,<br><i>SD</i> =0.73 |
|                                    |                                            |                                             |                                |                                                        |           |           |               | <b>Autoinject</b><br><b>or (&lt;75):</b><br>2.1%        |                                                                       |
| Bruce,<br>2010 <sup>14</sup>       | GA,<br>IFN $\beta$ -1a,<br>IFN $\beta$ -1b | <i>N</i> =67                                | MEMS                           |                                                        |           |           |               | <b>MEMS</b><br><b>(<math>\geq 80</math>):</b><br>82.0%  |                                                                       |

Cerghet, GA,  $n=111$  MPR  
 2010<sup>44</sup> IFN $\beta$ -1a,  
 IFN $\beta$ -1b  
 Cohan, IFN $\beta$ -1a,  $n=531$  MPR,  
 2018<sup>45</sup> IFN $\beta$ -1b (no PDC  
 switch)  
 ;  $n=117$   
 (switch  
 )

**MPR:**  
 $M=0.78,$   
 $SD=0.27$   
**Stable**  
**users:**  
**MPR:**  
 $M=0.92,$   
 $SD=NR$   
**Switchers:**  
**MPR:**  
 $M=0.78,$   
 $SD=NR$   
**Stable**  
**users:**  
**PDC:**  
 $M=0.86,$   
 $SD=NR$   
**Switchers:**  
**PDC:**  
 $M=0.74,$   
 $SD=NR$

Cohen, GA,  $n=2,41$  MPR  
 2015<sup>46</sup> IFN $\beta$ -1a, 0  
 IFN $\beta$ -1b

**MPR**  
**( $\geq 80$ ):**  
 79.0%;

Defer, 2018 <sup>49</sup> IFN $\beta$ -1a s.c. *n*=253 Electronic Autoinject or

Deftereos, 2018 IFN $\beta$ -1a s.c. *n*=62 Electronic Autoinject or

Degli Esposti, 2017 <sup>40</sup> IFN $\beta$ -1a, IFN $\beta$ -1b, GA *N*=1,698

Devonshire, 2016 <sup>51</sup> IFN $\beta$ -1a s.c. *n*=158 Electronic Autoinject or

Duquette, 2019 <sup>9</sup> IFN $\beta$ -1a, IFN $\beta$ -1b, GA *n*=4,607 (6-month); *n*=2,711 (12-month);

**MPR**  
**( $\geq 80$ ):**  
65.0%

**Autoinjector ( $\geq 80$ ):**  
82.9%

**MPR:** 53.0%    **MPR:** 47.0%    **MPR:** 35.0%

**Autoinjector:**  
*M*=0.98,  
*SD*=0.57

**Autoinjector:**  
*M*=0.89,  
*SD*=0.20

|                      |          |                |              |  |               |                            |
|----------------------|----------|----------------|--------------|--|---------------|----------------------------|
|                      |          | <i>n</i> =2,71 |              |  |               |                            |
|                      |          | 2 (24-         |              |  |               |                            |
|                      |          | month)         |              |  |               |                            |
| Evans,               | IFNβ-1a, | <i>N</i> =4,74 | MPR,         |  | <b>MPR:</b>   | <b>PDC</b>                 |
| 2017 <sup>54</sup> ; | IFNβ-1b, | 6              | PDC          |  | <b>(≥80):</b> | <b>(≥80):</b>              |
| 2016 <sup>55</sup>   | GA       | (2017);        |              |  | 75.1%.        | 42.4%                      |
|                      |          | <i>N</i> =4,83 |              |  | <b>PDC:</b>   |                            |
|                      |          | 0              |              |  | <b>(≥80):</b> |                            |
|                      |          | (2016)         |              |  | 76.4%         |                            |
| Fernández,           | IFNβ-1a  | <i>N</i> =258  | Electronic   |  |               | <b>Autoinjector (≥80):</b> |
| 2016 <sup>57</sup>   | s.c.     |                | Autoinjector |  |               | 86.8%                      |
|                      |          |                | or           |  |               |                            |
|                      |          |                |              |  |               |                            |
| Gerber,              | IFNβ-1a, | <i>n</i> =2,70 | MPR          |  | <b>MPR</b>    |                            |
| 2017 <sup>59</sup>   | IFNβ-1b, | 9              |              |  | <b>(≥80):</b> |                            |
|                      | GA       |                |              |  | 62.3%         |                            |
| Hansen,              | IFNβ-1a, | <i>N</i> =50,0 | MPR          |  |               | <b>MPR</b>                 |
| 2015 <sup>10</sup>   | IFNβ-1b, | 57             |              |  |               | <b>(≥80):</b>              |
|                      | GA       |                |              |  |               | 39.9%                      |
|                      |          |                |              |  |               |                            |
| Jones,               | GA       | <i>N</i> =5,82 | MPR          |  |               | <b>MPR</b>                 |
| 2013 <sup>60</sup>   |          | 5              |              |  |               | <b>(≥80):</b>              |
|                      |          |                |              |  |               | 74.3%                      |

|                                  |                                            |                     |                                |                                                            |                                                 |                                                            |
|----------------------------------|--------------------------------------------|---------------------|--------------------------------|------------------------------------------------------------|-------------------------------------------------|------------------------------------------------------------|
| Kleinman<br>, 2010 <sup>61</sup> | IFN $\beta$ -1a,<br>IFN $\beta$ -1b,<br>GA | <i>N</i> =358       | MPR                            |                                                            |                                                 | <b>MPR:</b><br><i>M</i> =0.74;<br><i>SD</i> =0.28          |
| Kleiter,<br>2017 <sup>62</sup>   | IFN $\beta$ -1b<br>s.c.                    | <i>n</i> =143       | Electronic<br>Autoinject<br>or | <b>Autoinject<br/>tor (<math>\geq 80</math>):</b><br>80.5% |                                                 |                                                            |
| Kozma,<br>2014 <sup>63</sup>     | IFN $\beta$ -1a,<br>IFN $\beta$ -1b,<br>GA | <i>N</i> =4,60<br>6 | PDC                            |                                                            | <b>PDC<br/>(<math>\geq 80</math>):</b><br>67.3% |                                                            |
| Krol,<br>2017 <sup>64</sup>      | IFN $\beta$ -1a<br>s.c.                    | <i>N</i> =1,68<br>2 | Electronic<br>Autoinject<br>or |                                                            |                                                 | <b>Autoinject<br/>tor (<math>\geq 80</math>):</b><br>82.9% |
| Lafata,<br>2008 <sup>19</sup>    | GA,<br>IFN $\beta$ -1a,<br>IFN $\beta$ -1b | <i>N</i> =224       | MPR                            |                                                            |                                                 |                                                            |

|                                         |                                            |                     |                                |                                                            |                                                 |                                                            |
|-----------------------------------------|--------------------------------------------|---------------------|--------------------------------|------------------------------------------------------------|-------------------------------------------------|------------------------------------------------------------|
| Lugaresi,<br>2012 <sup>66</sup>         | IFN $\beta$ -1a<br>s.c.                    | <i>n</i> =119       | Electronic<br>Autoinject<br>or | <b>Autoinject<br/>tor (<math>\geq 80</math>):</b><br>88.2% |                                                 |                                                            |
| McKay,<br>2017 <sup>67</sup>            | IFN $\beta$ -1a,<br>IFN $\beta$ -1b,<br>GA | <i>N</i> =135       | MPR                            |                                                            | <b>MPR<br/>(<math>\geq 80</math>):</b><br>57.0% |                                                            |
| Melesse,<br>2017 <sup>35</sup>          | IFN $\beta$ -1a,<br>IFN $\beta$ -1b,<br>GA | <i>N</i> =721       | PDC                            | <b>PDC<br/>(<math>\geq 80</math>):</b><br>80.0%;           |                                                 | <b>PDC<br/>(<math>\geq 80</math>):</b><br>86.0%            |
| Moccia,<br>2015 <sup>69</sup>           | IFN $\beta$ -1a<br>s.c                     | <i>N</i> =114       | Electronic<br>Autoinject<br>or |                                                            |                                                 | <b>Autoinject<br/>tor (<math>\geq 80</math>):</b><br>95.6% |
| Munsell,<br>2017 <sup>70</sup>          | IFN $\beta$ -1a,<br>IFN $\beta$ -1b,<br>GA | <i>n</i> =7,20<br>7 | MPR                            | <b>MPR<br/>(<math>\geq 80</math>):</b><br>54.1%            |                                                 | <b>MPR:</b><br><i>M</i> =0.69,<br><i>SD</i> =0.30          |
| Oleen-<br>Burkey,<br>2011 <sup>71</sup> | GA                                         | <i>N</i> =839       | MPR                            |                                                            | <b>MPR<br/>(<math>\geq 80</math>):</b><br>44.3% |                                                            |

|                                  |                       |         |                            |                                     |                            |                            |                                                      |                                   |
|----------------------------------|-----------------------|---------|----------------------------|-------------------------------------|----------------------------|----------------------------|------------------------------------------------------|-----------------------------------|
| Pedersen, 2018 <sup>73</sup>     | IFNβ-1a s.c.          | n=54    | Electronic Autoinjector or | <b>Autoinjector (≥80):</b><br>93.0% |                            |                            |                                                      |                                   |
| Sabido-Espin, 2017 <sup>75</sup> | IFNβ-1a s.c           | N=5,956 | MPR                        |                                     |                            |                            | <b>MPR (≥80):</b><br>51.7%                           |                                   |
| Sanchirico, 2019 <sup>76</sup>   | GA, IFNβ-1a, IFNβ-1b, | n=7,072 | PDC                        |                                     | <b>PDC (≥80):</b><br>90.0% |                            |                                                      |                                   |
| Settle, 2016 <sup>30</sup>       | IFNβ-1a i.m.          | n=13    | IC, MPR                    |                                     |                            |                            | <b>Routine care (IC, MPR):</b><br>M=0.95,<br>SD=0.11 |                                   |
| Shao, 2018 <sup>78</sup>         | IFNβ-1a, IFNβ-1b, GA  | n=6,003 | PDC                        |                                     | <b>PDC (≥80):</b><br>76.4% |                            |                                                      |                                   |
| Solsona, 2017 <sup>80</sup>      | IFNβ-1a s.c.          | N=110   | Electronic Autoinjector or |                                     |                            |                            | <b>Autoinjector (≥80):</b><br>90.0%                  |                                   |
| Steinberg, 2010 <sup>36</sup>    | IFNβ-1a, IFNβ-1b      | n=1,606 | MPR                        |                                     | <b>MPR (≥85):</b><br>27.0% | <b>MPR (≥85):</b><br>40.0% | <b>MPR (≥85):</b><br>41.0%                           | <b>MPR:</b><br>M=0.72,<br>SD=0.20 |



|                                 |                                            |                                                                                    |             |  |                                                                                                                                     |                                                                                                                                                                                                                        |
|---------------------------------|--------------------------------------------|------------------------------------------------------------------------------------|-------------|--|-------------------------------------------------------------------------------------------------------------------------------------|------------------------------------------------------------------------------------------------------------------------------------------------------------------------------------------------------------------------|
| Stockl,<br>2010 <sup>81</sup>   | IFN $\beta$ -1a,<br>IFN $\beta$ -1b,<br>GA | <i>n</i> =312                                                                      | MPR         |  |                                                                                                                                     | <b>SP/RP.</b><br><b>MPR:</b><br><i>M</i> =0.89<br><i>SD</i> =0.17                                                                                                                                                      |
| Tan,<br>2011 <sup>82</sup>      | IFN $\beta$ -1a,<br>IFN $\beta$ -1b,<br>GA | <i>n</i> =2,44<br>6                                                                | MPR         |  |                                                                                                                                     | <b>MPR</b><br><b>(<math>\geq 80</math>):</b><br>59.6%;                                                                                                                                                                 |
| Williams,<br>2018 <sup>85</sup> | GA                                         | <i>n</i> =109<br>(Hispan<br>ic);<br><i>n</i> =139<br>(Africa<br>n<br>Americ<br>an) | MPR,<br>PDC |  | <b>Hispanic</b><br><b>MPR</b><br><b>(<math>\geq 80</math>):</b><br>65.1%;<br><b>PDC</b><br><b>(<math>\geq 80</math>):</b><br>53.2%. | <b>Hispanic</b><br><b>MPR:</b><br><i>M</i> =0.80,<br><i>SD</i> =0.24;<br><b>PDC:</b><br><i>M</i> =0.71,<br><i>SD</i> =0.28.<br><b>African</b><br><b>American</b><br><b>MPR:</b><br><i>M</i> =0.80,<br><i>SD</i> =0.22; |

|                              |                                            |         |                                |                                       |                                              |                                                                                                                                                                                    |                                   |                                         |                                            |
|------------------------------|--------------------------------------------|---------|--------------------------------|---------------------------------------|----------------------------------------------|------------------------------------------------------------------------------------------------------------------------------------------------------------------------------------|-----------------------------------|-----------------------------------------|--------------------------------------------|
|                              |                                            |         |                                |                                       | <b>PDC</b><br>( $\geq 80$ ):<br>46.0%        |                                                                                                                                                                                    |                                   |                                         | <b>PDC:</b><br>$M=0.67$ ,<br>$SD=0.29$     |
| Zecca,<br>2017 <sup>38</sup> | IFN $\beta$ -1a<br>s.c                     | $n=53$  | Electronic<br>Autoinject<br>or |                                       |                                              | <b>Autoinject</b><br><b>tor (&lt;</b><br><b>90%):</b><br>28.3%;<br><b>Autoinject</b><br><b>tor (90–</b><br><b>99.9%):</b><br>24.0%;<br>Autoinject<br>or<br><b>(100%):</b><br>37.7% |                                   |                                         |                                            |
| Zhang,<br>2017 <sup>86</sup> | IFN $\beta$ -1a,<br>IFN $\beta$ -1b,<br>GA | $N=801$ | PDC                            |                                       |                                              | <b>PDC</b><br>( $\geq 80$ ):<br>74.7%                                                                                                                                              |                                   |                                         |                                            |
|                              |                                            |         |                                | <b>Autoinject</b>                     | <b>MPR:</b> $n=7$ ,<br>range, 47.0-<br>77.4% | <b>MPR:</b> $n=7$ ,<br>range,<br>35.0-<br>79.0%                                                                                                                                    | <b>MPR:</b> $n=1$ ,<br>$M=51.7\%$ | <b>Autoinject</b>                       | <b>MPR:</b> $n=8$ ,<br>range,<br>0.69-0.92 |
|                              |                                            |         |                                | range,<br>80.5-<br>93.0%              | <b>PDC:</b> $n=6$ ,<br>range, 46.0-<br>90.0% | <b>PDC:</b> $n=2$ ,<br>range,<br>42.4-<br>86.0%                                                                                                                                    | <b>PDC:</b> $n=2$ ,<br>$M=0.95$   | <b>IC/MPR:</b> $n=1$ ,<br>$M=0.95$      | <b>PDC:</b> $n=3$ ,<br>range,<br>0.67-0.86 |
|                              |                                            |         |                                | <b>MEMS:</b><br>$n=1$ ,<br>$M=82.0\%$ |                                              |                                                                                                                                                                                    |                                   | <b>Autoinject</b><br><b>or:</b> $n=2$ , |                                            |

|                 |       |                          |           |
|-----------------|-------|--------------------------|-----------|
| <b>MPR:</b>     | 67.3- | <b>Autoinjec</b>         | range,    |
| <i>n</i> =1,    | 74.7% | <b>tor:</b> <i>n</i> =4, | 0.97-0.98 |
| <i>M</i> =53.0% |       | range,                   |           |
|                 |       | 82.9-                    |           |
|                 |       | 95.6%                    |           |

*M*=mean, *SD*=standard deviation, *N*=total sample, *n*=subgroup, NR=not reported

Note: Studies reporting data for multiple subgroups were classified as a single study. Sample sizes included are reported statistics, not total sample, unless specified; Unless otherwise stated, IFNβ-1a and subcutaneous administration. All studies are observational unless otherwise stated. Only baseline and preintervention data are reported for intervention studies. Where required, means and combined excluding IV medications data, using weighted sample group statistics through an online calculator: [https://www.statstodo.com/CombineMeansSDs\\_Pgm.php](https://www.statstodo.com/CombineMeansSDs_Pgm.php).

Abbreviations: GA=glatiramer acetate; IC=injection count; IFNβ-1a=interferon beta-1a; IFNβ-1a i.m=interferon beta-1a intramuscular; IFNβ-1a s.c=interferon beta-1a subcutaneous; IFNβ-1b=interferon beta-1b; MEMS=medication event monitoring system; MPR=medication possession ratio; PDC=proportion of days covered; PC=pill count

*N*=40

## SUPPLEMENTARY TABLE 2 Objective adherence rates for oral DMTs

| Author,<br>year     | DMT(s) | Sample size | Adherence<br>measure | Adherence: Cut-off score (≥80<br>unless specified) | Adherence: <i>M</i> , <i>SD</i> | Comments |
|---------------------|--------|-------------|----------------------|----------------------------------------------------|---------------------------------|----------|
| <b>&lt;8 months</b> |        |             |                      |                                                    |                                 |          |

|                                |               |                 |          |                                                  |                                                                                          |                                                                                                                                      |
|--------------------------------|---------------|-----------------|----------|--------------------------------------------------|------------------------------------------------------------------------------------------|--------------------------------------------------------------------------------------------------------------------------------------|
| Aungst, 2019 <sup>42</sup>     | DMF           | <i>n</i> =25    | PC, MEMS |                                                  | <b>PC:</b> <i>M</i> =0.91, <i>SD</i> =0.14; <b>MEMS:</b> <i>M</i> =0.90, <i>SD</i> =0.19 | Examined adherence over 6-month period; defined pill count as pill count compliance, and measured medication cap compliance via MEMS |
| Duquette, 2019 <sup>9</sup>    | FTY, DMF, TFN | <i>n</i> =7,305 | MPR      | <b>MPR (≥80):</b> 74.0%                          |                                                                                          | Examined adherence over 6 months                                                                                                     |
| <b>12 months</b>               |               |                 |          |                                                  |                                                                                          |                                                                                                                                      |
| Agashivala, 2013 <sup>41</sup> | FTY           | <i>n</i> =248   | MPR, PDC | <b>MPR (≥80):</b> 88.9%; <b>PDC (≥80):</b> 70.2% | <b>MPR:</b> <i>M</i> =0.91, <i>SD</i> =0.09; <b>PDC:</b> <i>M</i> =0.81, <i>SD</i> =0.23 | New oral DMT users                                                                                                                   |
| Aungst, 2019 <sup>42</sup>     | DMF           | <i>n</i> =25    | PC, MEMS |                                                  | <b>PC:</b> <i>M</i> =0.89, <i>SD</i> =0.19; <b>MEMS:</b> <i>M</i> =0.84, <i>SD</i> =0.34 | Defined pill count as Pill count compliance, and measures medication cap compliance via MEMS                                         |
| Burks, 2017 <sup>13</sup>      | FTY, DMF, TFN | <i>n</i> =1,018 | PDC      | <b>PDC (≥80):</b> 61.4%                          | <b>PDC:</b> <i>M</i> =0.73, <i>SD</i> =0.29                                              |                                                                                                                                      |
| Duquette, 2019 <sup>9</sup>    | FTY, DMF, TFN | <i>n</i> =4,567 | MPR      | <b>MPR (≥80):</b> 73.3%                          |                                                                                          |                                                                                                                                      |
| Gerber, 2017 <sup>59</sup>     | FTY, DMF, TFN | <i>n</i> =72    | MPR      | <b>MPR (≥80):</b> 66.7%                          |                                                                                          |                                                                                                                                      |

|                                   |                     |                                                      |          |                                                                                                                                         |                                                                                                                                                        |                                                                |
|-----------------------------------|---------------------|------------------------------------------------------|----------|-----------------------------------------------------------------------------------------------------------------------------------------|--------------------------------------------------------------------------------------------------------------------------------------------------------|----------------------------------------------------------------|
| Johnson,<br>2017 <sup>12</sup>    | FTY,<br>DMF,<br>TFN | N=1,498                                              | PDC, MPR | <b>MPR (≥80): 77.3%; PDC (≥80):</b><br>62.9%                                                                                            | <b>MPR: M=0.90, SD=0.14; PDC:</b><br>M=0.74, SD=0.31                                                                                                   |                                                                |
| Sanchirico,<br>2019 <sup>76</sup> | FTY,<br>DMF,<br>TFN | n=7,072                                              | PDC      | <b>PDC (≥80): 94.0%</b>                                                                                                                 |                                                                                                                                                        |                                                                |
| Munsell,<br>2017 <sup>70</sup>    | FTY,<br>DMF,<br>TFN | n=1,175                                              | MPR      | <b>MPR (≥80): 53.0%</b>                                                                                                                 | <b>MPR: M=0.68, SD=0.30</b>                                                                                                                            | Newly initiated treatment                                      |
| Schreiber,<br>2018 <sup>77</sup>  | FTY                 | n=126                                                | PC       |                                                                                                                                         | <b>PC: M=0.99, SD=0.07</b>                                                                                                                             | Intervention study, but<br>only observational data<br>reported |
| Vieira,<br>2019 <sup>83</sup>     | FTY,<br>TFN         | N=4,563                                              | MPR, PDC | <b>MPR (≥80): 89.2%; PDC (≥80):</b><br>60.4%                                                                                            | <b>MPR: M=0.92, SD=0.09; PDC:</b><br>M=0.73, SD=0.28                                                                                                   |                                                                |
| Williams,<br>2018 <sup>85</sup>   | FTY                 | n=62<br>(Hispanic);<br>n=71<br>(African<br>American) | MPR, PDC | <b>Hispanic: MPR (≥80): 80.7%;</b><br><b>PDC (≥80): 71.0%.</b><br><b>African American: MPR (≥80):</b><br>70.4%; <b>PDC (≥80): 63.4%</b> | <b>Hispanic: MPR: M=0.88, SD=0.12;</b><br><b>PDC: M=0.83, SD=0.18</b><br><b>African American: MPR: M=0.83,</b><br><b>SD=0.20; PDC: M=0.78, SD=0.24</b> | Hispanic and African<br>American subgroups                     |
|                                   |                     |                                                      |          | <b>MPR: n=7, range, 53.0-89.2%</b>                                                                                                      | <b>MPR: n=5, range, 0.68-0.92</b>                                                                                                                      |                                                                |
|                                   |                     |                                                      |          | <b>PDC: n=6, range, 60.4-94.0%</b>                                                                                                      | <b>PDC: n=5, range, 0.73-0.83</b>                                                                                                                      |                                                                |
|                                   |                     |                                                      |          |                                                                                                                                         | <b>PC: n=2, range, 0.89-0.99</b>                                                                                                                       |                                                                |
|                                   |                     |                                                      |          |                                                                                                                                         | <b>MEMS: n=1, 0.84</b>                                                                                                                                 |                                                                |
| <b>24 months</b>                  |                     |                                                      |          |                                                                                                                                         |                                                                                                                                                        |                                                                |

|                             |               |                 |         |                                                                                                                                                                  |                                                                                                                       |
|-----------------------------|---------------|-----------------|---------|------------------------------------------------------------------------------------------------------------------------------------------------------------------|-----------------------------------------------------------------------------------------------------------------------|
| Duquette, 2019 <sup>9</sup> | FTY, DMF, TFN | <i>n</i> =3,029 | MPR     | <b>MPR (≥80):</b> 64.7%                                                                                                                                          |                                                                                                                       |
| Zimmer, 2017 <sup>88</sup>  | FTY           | <i>N</i> =76    | PDC, PC | <b>Perfect (100%):</b> 41.1%<br><b>Optimal (&gt; 96.2%):</b> 88.2%<br><b>suboptimal (&lt; 96.2%, but &gt; 85.8%):</b> 11.8%, <b>nonadherent (&lt; 85.8%):</b> 0% | Excluded patients that did not remain on treatment, <i>n</i> =19 recorded as nonpersistent and <i>n</i> =3 as unknown |

*M*=mean, *SD*=standard deviation, *N*=total sample, *n*=subgroup

Note: Studies reporting data for multiple subgroups were classified as a single study. Sample sizes included are reported statistics, not total sample, unless specified. All studies are observational unless otherwise stated. Only baseline and preintervention data are reported for intervention studies. Where required, means and standard deviations were combined excluding IV medications data, using sample group statistics through an online calculator:

[https://www.statstodo.com/CombineMeansSDs\\_Pgm.php](https://www.statstodo.com/CombineMeansSDs_Pgm.php).

Abbreviations: DMF=dimethyl fumarate; FTY=fingolimod; MEMS=medication monitoring event system; MPR=medication possession ratio; PC=pill count; PDC=proportion of days covered; TFN=teriflunomide.

*N*=12

SUPPLEMENTARY TABLE 3 Discontinuation rates for oral and injectable DMTs

| Author, year | Definition of discontinuation | Study length | Sample size | DMT(s) | Oral | Injectable | Comments |
|--------------|-------------------------------|--------------|-------------|--------|------|------------|----------|
|--------------|-------------------------------|--------------|-------------|--------|------|------------|----------|

| <b>&lt;12 Months</b>           |              |           |                                                               |                                              |                                                                                  |                                                                                                                                                                                                                          |
|--------------------------------|--------------|-----------|---------------------------------------------------------------|----------------------------------------------|----------------------------------------------------------------------------------|--------------------------------------------------------------------------------------------------------------------------------------------------------------------------------------------------------------------------|
| Duquette, 2019 <sup>9</sup>    | >30-day gap  | 6 months  | <i>n</i> =7,712<br>(oral);<br><i>n</i> =5,379<br>(injectable) | IFNβ-1a,<br>IFNβ-1b,<br>GA, FTY,<br>DMF, TFN | <b>FTY, DMF, TFN: 28.0%</b>                                                      | <b>IFNβ-1a, IFNβ-1b, GA: 49.0%</b>                                                                                                                                                                                       |
| Evans, 2012 <sup>56</sup>      | >90-day gap  | <6 months | <i>N</i> =1,896                                               | IFNβ-1a,<br>IFNβ-1b,<br>GA                   |                                                                                  | <b>IFNβ-1a, IFNβ-1b, GA: 5.0%</b>                                                                                                                                                                                        |
| Evans, 2016 <sup>55</sup>      | >90-day gap  | <6 months | <i>N</i> =4,830                                               | IFNβ-1a,<br>IFNβ-1b,<br>GA                   |                                                                                  | <b>IFNβ-1a, IFNβ-1b, GA: 9.3%</b>                                                                                                                                                                                        |
| Stockl, 2010 <sup>81</sup>     | >30-day gap  | 8 months  | <i>n</i> =312                                                 | IFNβ-1a,<br>IFNβ-1b,<br>GA                   |                                                                                  | <b>SP/RP: 25.0%</b>                                                                                                                                                                                                      |
|                                |              |           |                                                               |                                              | <b>Overall: <i>n</i>=1, 28.0%</b>                                                | <b>Overall: <i>n</i>=4, range, 5.0-49.0%</b>                                                                                                                                                                             |
|                                |              |           |                                                               |                                              | <b>&gt;30-day gap: <i>n</i>=1, 28.0%</b>                                         | <b>&gt;30-day gap: <i>n</i>=2, range, 25.0-49.0%</b>                                                                                                                                                                     |
|                                |              |           |                                                               |                                              |                                                                                  | <b>&gt;90-day gap: <i>n</i>=2, range, 5.0-9.3%</b>                                                                                                                                                                       |
| <b>12 Months</b>               |              |           |                                                               |                                              |                                                                                  |                                                                                                                                                                                                                          |
| Agashivala, 2013 <sup>41</sup> | > 60-day gap | 12 months | <i>n</i> =248<br>(oral);<br><i>n</i> =1,643<br>(injectable)   | FTY, IFNβ-1b, IFNβ-1a, GA                    | <b>1<sup>st</sup> DMT: FTY: 30.2%.</b><br><b>2<sup>nd</sup>+ DMT: FTY: 21.1%</b> | <b>1<sup>st</sup> DMT: IFNβ-1b, IFNβ-1a, GA: 37.0%</b><br><b>2<sup>nd</sup>+ DMT: IFNβ-1b, IFNβ-1a, GA: 35.0%</b><br>1 <sup>st</sup> DMT are people who started their first DMT;<br>2 <sup>nd</sup> + DMT are people who |

|                                |                 |           |                                         |                                     |                             |                                    |                                                                                                |
|--------------------------------|-----------------|-----------|-----------------------------------------|-------------------------------------|-----------------------------|------------------------------------|------------------------------------------------------------------------------------------------|
| Burks, 2017 <sup>13</sup>      | >90-day gap     | 12 months | n=1,018                                 | TFN, FTY, DMF                       | <b>TFN, FTY, DMF: 16.9%</b> |                                    | switched to a subsequent DMT<br>Injectable data contained intravenous, thus, were not included |
| Cohan, 2018 <sup>45</sup>      | Discontinuation | 12 months | N=708                                   | IFNβ-1a, IFNβ-1b                    |                             | <b>IFNβ-1a, IFNβ-1b: 15.2%</b>     | Discontinuation rate for patients stable on any IFN beta therapy                               |
| Duquette, 2019 <sup>9</sup>    | >30-day gap     | 12 months | n=5,995 (oral);<br>n=4,433 (injectable) | IFNβ-1a, IFNβ-1b, GA, FTY, DMF, TFN | <b>FTY, DMF, TFN: 26.3%</b> | <b>IFNβ-1a, IFNβ-1b, GA: 44.0%</b> |                                                                                                |
| Evans, 2016 <sup>55</sup>      | >90-day gap     | 12 months | N=4,830                                 | IFNβ-1a, IFNβ-1b, GA                |                             | <b>IFNβ-1a, IFNβ-1b, GA: 17.6%</b> |                                                                                                |
| Munsell, 2017 <sup>70</sup>    | >90-day gap     | 12 months | n=1,175 (oral);<br>n=7,207 (injectable) | IFNβ-1a, IFNβ-1b, GA, TFN, FTY, DMF | <b>TFN, FTY, DMF: 28.2%</b> | <b>IFNβ-1a, IFNβ-1b, GA: 26.6%</b> |                                                                                                |
| Prosperini, 2019 <sup>74</sup> | Discontinuation | 12 months | Prematchin g: N=621;<br>PEG, n=196,     | PEG, DMF, TFN                       | <b>DMF, TFN: 15.8%</b>      | <b>PEG: 28.6%</b>                  | Pre and postmatching cohorts examined                                                          |



|                                              |                 |                         |                                                            |                                              |                                                        |                                                        |
|----------------------------------------------|-----------------|-------------------------|------------------------------------------------------------|----------------------------------------------|--------------------------------------------------------|--------------------------------------------------------|
|                                              |                 |                         | DMF,<br><i>n</i> =265,<br>TFN,<br><i>n</i> =160.           |                                              |                                                        |                                                        |
| Sabido-<br>Espin,<br>2017 <sup>75</sup>      | >90-day gap     | 12 months               | <i>N</i> =5,956                                            | IFNβ-1a s.c                                  |                                                        | <b>IFNβ-1a s.c:</b> 20.6%                              |
| Warrender-<br>Sparkes,<br>2016 <sup>84</sup> | >90-day gap     | 12 months               | <i>n</i> =45<br>(oral);<br><i>n</i> =2,527<br>(injectable) | IFNβ-1a,<br>IFNβ-1b,<br>GA, FTY              | <b>FTY:</b> 10.5%;                                     | <b>IFNβ-1a, IFNβ-1b, GA:</b> 20.6%                     |
| Smith,<br>2015 <sup>79</sup>                 | Discontinuation | <i>M</i> =554.2<br>days | <i>N</i> =8,107                                            | IFNβ-1a                                      |                                                        | <b>IFNβ-1a:</b> 26.4%                                  |
| Gerber,<br>2017 <sup>59</sup>                | >90-day gap     | 12 months               | <i>n</i> =72<br>(oral);<br><i>n</i> =2,709<br>(injectable) | IFNβ-1a,<br>IFNβ-1b,<br>GA, FTY,<br>TFN, DMF | <b>FTY, TFN, DMF:</b> 33.3%                            | <b>IFNβ-1a, IFNβ-1b, GA:</b> 50.8%                     |
|                                              |                 |                         |                                                            |                                              | <b>Overall:</b> <i>n</i> =7, range, 10.5-33.3%         | <b>Overall:</b> <i>n</i> =10, range, 15.2%-50.8%       |
|                                              |                 |                         |                                                            |                                              | <b>&gt;30-day gap:</b> <i>n</i> =1, 26.3%              | <b>&gt;30-day gap:</b> <i>n</i> =1, 44.0%              |
|                                              |                 |                         |                                                            |                                              | <b>&gt;60-day gap:</b> <i>n</i> =1, range, 21.1%-30.2% | <b>&gt;60-day gap:</b> <i>n</i> =1, range, 35.0%-37.0% |
|                                              |                 |                         |                                                            |                                              | <b>&gt;90-day gap:</b> <i>n</i> =4, range, 10.5%-33.3% | <b>&gt;90-day gap:</b> <i>n</i> =5, range, 17.6%-50.8% |
|                                              |                 |                         |                                                            |                                              | <b>Discontinuation:</b> <i>n</i> =1, 15.8%             |                                                        |

**Discontinuation:**  $n=3$ , range,  
15.2%-28.6%

**24 Months**

|                              |                 |                                                    |                                                                        |                                                              |                             |                                                                      |                                                                             |
|------------------------------|-----------------|----------------------------------------------------|------------------------------------------------------------------------|--------------------------------------------------------------|-----------------------------|----------------------------------------------------------------------|-----------------------------------------------------------------------------|
| Bonafede, 2013 <sup>39</sup> | >59-day gap     | 24 months                                          | $n=5,710$                                                              | IFN $\beta$ -1a,<br>IFN $\beta$ -1b,<br>GA                   |                             | <b>IFN<math>\beta</math>-1a, IFN<math>\beta</math>-1b, GA:</b> 8.7%  | 55.3% had a treatment gap >60 days; Fingolimod excluded as an index therapy |
| Braune, 2016 <sup>43</sup>   | Discontinuation | 24 months;<br>PM:<br>$M=1037.8$<br>(461.2)<br>days | $N=433$ ;<br>Propensity<br>matched:<br>$n=198$ (99<br>FTY, 99<br>iDMT) | IFN $\beta$ -1a,<br>IFN $\beta$ -1b,<br>GA; FTY              | <b>FTY:</b> 12.1%           | <b>IFN<math>\beta</math>-1a, IFN<math>\beta</math>-1b, GA:</b> 36.4% | Only provides discontinuation data for propensity matched sample of $n=198$ |
| Condé, 2019 <sup>47</sup>    | Discontinuation | 24 months                                          | $N=346$                                                                | DMF, TFN                                                     | <b>DMF, TFN:</b> 33.1%      |                                                                      |                                                                             |
| D'Amico, 2019 <sup>48</sup>  | >60-day gap     | 24 months                                          | $N=903$                                                                | DMF, TFN                                                     | <b>DMF, TFN:</b> 8.9%       |                                                                      |                                                                             |
| Duquette, 2019 <sup>9</sup>  | >30-day gap     | 24 months                                          | $n=3,435$<br>(oral);<br>$n=4,353$<br>(injectable)                      | IFN $\beta$ -1a,<br>IFN $\beta$ -1b,<br>GA, FTY,<br>DMF, TFN | <b>FTY, DMF, TFN:</b> 34.0% | <b>IFN<math>\beta</math>-1a, IFN<math>\beta</math>-1b, GA:</b> 57.0% |                                                                             |
| Eriksson, 2018 <sup>52</sup> | >60-day gap     | Median,<br>2.5 years                               | $N=400$                                                                | DMF                                                          | <b>DMF:</b> 31.0%           |                                                                      |                                                                             |

Ernst, 2017<sup>53</sup> >30-day gap 24 months *n*=307 IFN $\beta$ -1a s.c., **DMF: 8.1%** **IFN $\beta$ -1a s.c: 11.9%**  
 (oral); DMF  
*n*=143  
 (injectable)

Sabido-Espin, 2017<sup>75</sup> >90-day gap 24 months *N*=5,956 IFN $\beta$ -1a s.c **IFN $\beta$ -1a s.c: 22.6%**

Zimmer, 2017<sup>88</sup> Discontinuation 24 months *N*=98 FTY **FTY: 1.0%** (complete discontinuation)

19 participants who discontinued fingolimod, eight switched directly to alternative therapy, five interrupted treatment for pregnancy, and six stopped treatment without immediate intention to initiate an alternative treatment. Post hoc analysis showed that all except for one initiated alternative

treatment at a later  
time

Fernández-  
Fournier,  
2015 <sup>58</sup>    Discontinuation    Median: 34 months    N=155    GA    **GA: 6.3%**

---

**Overall:** n=7, range, 1.0%-34.0%  
**>30-day gap:** n=2, range, 8.1%-34.0%  
**>60-day gap:** n=2, range, 8.9%-31.0%  
**Discontinuation:** n=3, range, 1.0%-33.1%  
**Overall:** n=6, range, 6.3%-57.0%  
**>30-day gap:** n=2, range, 11.9%-57.0%  
**>59-day gap:** n=1, 8.7%  
**>90-day gap:** n=1, 22.6%  
**Discontinuation:** n=2, range, 6.3%-36.4%

---

**36 Months +**

Lebrun-  
Frenay,  
2019 <sup>65</sup>    Discontinuation    Up to 5 years    n=852    GA    **GA: 53.6%**

Sabido-  
Espin,  
2017 <sup>75</sup>    >90-day gap    36 months    N=5,956    IFNβ-1a s.c.    **IFNβ-1a s.c: 30.6%**

Melesse,  
2017 <sup>35</sup>    >90-day gap    M=7.8 years    N=721    IFNβ-1a,  
IFNβ-1b,  
GA    **IFNβ-1a, IFNβ-1b, GA: 26.6%**  
(complete discontinuation)    57.4% resumed at  
some point; 62.6%  
discontinued (>90-  
days); 26.4%  
discontinued for

<1 year; 4.7%  
discontinued for  
>1 - <2 years;  
4.9% discontinued  
for >2 - <3 years

|                                   |             |                                                                              |                 |                                            |                                                                                                    |                                                                                                                                                                        |
|-----------------------------------|-------------|------------------------------------------------------------------------------|-----------------|--------------------------------------------|----------------------------------------------------------------------------------------------------|------------------------------------------------------------------------------------------------------------------------------------------------------------------------|
| Moccia,<br>2016 <sup>68</sup>     | >90-day gap | >5 years;<br><i>M</i> =7.9,<br><i>SD</i> =3.8<br>years                       | <i>N</i> =499   | IFN $\beta$ -1a,<br>IFN $\beta$ -1b        | <b>IFN<math>\beta</math>-1a, IFN<math>\beta</math>-1b: 9.7%</b>                                    |                                                                                                                                                                        |
| Evans,<br>2012 <sup>56</sup>      | >90-day gap | Up to 14<br>years                                                            | <i>n</i> =1,896 | IFN $\beta$ -1a,<br>IFN $\beta$ -1b,<br>GA | <b>IFN<math>\beta</math>-1a, IFN<math>\beta</math>-1b, GA: 26.0%</b><br>(complete discontinuation) | Discontinuation<br>based on initial<br>DMT, accounts for<br>switchers but not<br>those who<br>discontinued<br>following switch;<br>< 6 months: 5.0%<br>discontinuation |
| Zhornitsky,<br>2015 <sup>87</sup> | >90-day gap | Up to 18<br>years;<br><i>M</i> =6.1,<br><i>SD</i> =4.4<br>years<br>(range 0- | <i>N</i> =1,471 | IFN $\beta$ -1a,<br>IFN $\beta$ -1b,<br>GA | <b>IFN<math>\beta</math>-1a, IFN<math>\beta</math>-1b, GA: 19.0%</b><br>(complete discontinuation) | Recommences did<br>not necessarily<br>recommence an<br>injectable, but may<br>have changed to<br>oral or IV DMT                                                        |

|                                         |                                                                                                                        |                        |                 |                            |                                                                                                          |
|-----------------------------------------|------------------------------------------------------------------------------------------------------------------------|------------------------|-----------------|----------------------------|----------------------------------------------------------------------------------------------------------|
|                                         |                                                                                                                        | 18 years<br>follow-up) |                 |                            |                                                                                                          |
| Degil<br>Esposti,<br>2017 <sup>40</sup> | Temporary<br>discontinuation <<br>6-month drug<br>absence;<br>Definitive<br>interruption >12-<br>month drug<br>absence | 36 months              | <i>N</i> =1,698 | IFNβ-1a,<br>IFNβ-1b,<br>GA | <b>IFNβ-1a, IFNβ-1b, GA:</b><br>Discontinuation (<6 months):<br>37.0%; Definitive interruption:<br>28.0% |

---

**Overall:** *n*=7, range, 9.7%-53.6%  
**>90-day gap:** *n*=5, range, 9.7%-  
30.6%  
**<6-month absence:** *n*=1, 37.0%  
**>12-month absence:** *n*=1, 28.0%  
**Discontinuation:** *n*=1, 53.6%

---

*N*=total sample, *n*=subgroup, *M*=mean, *SD*=standard deviation

Note: Studies reporting data for multiple subgroups were classified as a single study. Unless otherwise stated, IFNβ-1a includes both intramuscular and subcutaneous administration. All studies are observational unless otherwise stated. Where required, means and standard deviations were combined excluding IV medications data, using sample group statistics through an online calculator: [https://www.statstodo.com/CombineMeansSDs\\_Pgm.php](https://www.statstodo.com/CombineMeansSDs_Pgm.php).

Abbreviations: DMF=dimethyl fumarate; DMT=disease-modifying therapy; FTY=fingolimod; GA=glatiramer acetate; IFNβ-1a=interferon beta-1a; IFNβ-1a i.m=interferon beta-1a intramuscular; IFNβ-1a s.c.=interferon beta-1a subcutaneous; IFNβ-1b=interferon beta-1b; MS=multiple sclerosis; PEG=pegylated Interferon; PM=propensity matched; RP=retail pharmacy; RRMS=relapse remitting multiple sclerosis; SP=speciality pharmacy; TFN=teriflunomide.

SUPPLEMENTARY TABLE 4 Appraisal tool for cross-sectional studies (AXIS) for included objective studies

---

| <b>AXIS Criteria</b> |                |                |                   |              |              |
|----------------------|----------------|----------------|-------------------|--------------|--------------|
| <b>Intro</b>         | <b>Methods</b> | <b>Results</b> | <b>Discussion</b> | <b>Other</b> | <b>Total</b> |

---





|                                         |   |   |     |   |   |   |     |   |   |   |   |   |     |     |   |   |   |   |   |    |    |
|-----------------------------------------|---|---|-----|---|---|---|-----|---|---|---|---|---|-----|-----|---|---|---|---|---|----|----|
| D'Amico,<br>2019 <sup>48</sup>          | Y | Y | N   | Y | Y | Y | Y   | Y | Y | Y | Y | Y | N   | Y   | Y | Y | Y | Y | Y | Y  | 17 |
| Defer,<br>2018 <sup>49</sup>            | Y | Y | N/A | Y | Y | Y | N/A | Y | Y | Y | Y | Y | N/A | N/A | Y | Y | Y | Y | Y | NP | 12 |
| Deftereos<br>, 2018 <sup>50</sup>       | Y | Y | N   | Y | Y | Y | Y   | Y | Y | Y | Y | Y | N   | Y   | Y | Y | Y | Y | Y | Y  | 17 |
| Degil<br>Esposti,<br>2017 <sup>40</sup> | Y | Y | N/A | Y | Y | Y | N/A | Y | Y | Y | Y | Y | N/A | N/A | Y | Y | Y | Y | N | NP | 14 |
| Devonshi<br>re, 2016<br><sup>51</sup>   | Y | Y | Y   | Y | Y | Y | N   | Y | Y | Y | Y | Y | N   | N   | Y | Y | Y | Y | Y | Y  | 16 |
| Duquette<br>, 2019 <sup>9</sup>         | Y | Y | N/A | Y | Y | Y | N/A | Y | Y | N | Y | N | N/A | N/A | Y | Y | Y | Y | Y | NR | 11 |
| Eriksson,<br>2018 <sup>52</sup>         | Y | Y | N/A | Y | Y | Y | N   | Y | Y | Y | Y | Y | N/A | N/A | Y | Y | Y | Y | N | Y  | 16 |
| Ernst,<br>2017 <sup>53</sup>            | Y | Y | Y   | Y | Y | Y | N/A | Y | Y | Y | Y | Y | N/A | N/A | Y | Y | Y | Y | Y | NR | 14 |
| Evans,<br>2017 <sup>54</sup>            | Y | Y | N/A | Y | Y | Y | N/A | Y | Y | Y | Y | Y | N/A | N/A | Y | Y | Y | Y | N | Y  | 16 |
| Evans,<br>2016 <sup>55</sup>            | Y | Y | N/A | Y | Y | Y | N/A | Y | Y | Y | Y | Y | N/A | N/A | Y | Y | Y | Y | N | Y  | 16 |
| Evans,<br>2012 <sup>56</sup>            | Y | Y | N/A | Y | Y | Y | N/A | Y | Y | Y | Y | Y | N/A | N/A | Y | Y | Y | Y | N | Y  | 16 |
| Fernández,<br>2016 <sup>57</sup>        | Y | Y | N/A | Y | Y | Y | N/A | Y | Y | Y | Y | Y | N/A | N/A | Y | Y | Y | Y | N | Y  | 16 |



|                                         |   |   |     |   |   |   |     |   |   |   |   |   |     |     |   |   |   |   |   |    |    |
|-----------------------------------------|---|---|-----|---|---|---|-----|---|---|---|---|---|-----|-----|---|---|---|---|---|----|----|
| Lugaresi,<br>2012 <sup>66</sup>         | Y | Y | N   | Y | Y | Y | Y   | Y | Y | Y | Y | Y | Y   | N   | Y | Y | Y | Y | Y | Y  | 17 |
| McKay,<br>2017 <sup>67</sup>            | Y | Y | N   | Y | Y | Y | Y   | Y | Y | Y | Y | Y | N   | Y   | Y | Y | Y | Y | N | Y  | 19 |
| Melesse,<br>2017 <sup>35</sup>          | Y | Y | N/A | Y | Y | Y | N/A | Y | Y | Y | Y | Y | N/A | N/A | Y | Y | Y | Y | N | Y  | 16 |
| Moccia,<br>2016 <sup>68</sup>           | Y | Y | N/A | Y | Y | Y | Y   | Y | Y | Y | Y | Y | N/A | N/A | Y | Y | Y | Y | N | Y  | 17 |
| Moccia,<br>2015 <sup>69</sup>           | Y | Y | Y   | Y | Y | Y | N/A | Y | Y | Y | Y | Y | N/A | N/A | Y | Y | Y | Y | N | Y  | 17 |
| Munsell,<br>2017 <sup>70</sup>          | Y | Y | N/A | Y | Y | Y | N/A | Y | Y | Y | Y | Y | N/A | N/A | Y | Y | Y | Y | N | NR | 15 |
| Oleen-<br>Burkey,<br>2011 <sup>71</sup> | Y | Y | N/A | Y | Y | Y | N/A | Y | Y | Y | Y | Y | N/A | N/A | Y | Y | Y | Y | Y | NP | 12 |
| Paolicelli<br>, 2016 <sup>72</sup>      | Y | Y | N   | Y | Y | Y | N   | Y | Y | Y | Y | Y | N   | N   | Y | Y | Y | Y | N | Y  | 17 |
| Pedersen,<br>2018 <sup>73</sup>         | Y | Y | Y   | Y | Y | Y | N   | Y | Y | Y | Y | Y | N   | Y   | Y | Y | Y | Y | Y | Y  | 17 |
| Prosperin<br>i, 2019 <sup>74</sup>      | Y | Y | N/A | Y | Y | Y | N/A | Y | N | Y | N | Y | N/A | N/A | Y | Y | Y | Y | N | Y  | 14 |
| Sabido-<br>Espin,<br>2017 <sup>75</sup> | Y | Y | N/A | Y | Y | Y | N/A | Y | Y | Y | Y | Y | N/A | N/A | Y | Y | Y | Y | Y | NR | 13 |

|                                       |   |   |     |   |   |   |     |   |   |   |   |   |     |     |   |   |   |   |   |    |    |
|---------------------------------------|---|---|-----|---|---|---|-----|---|---|---|---|---|-----|-----|---|---|---|---|---|----|----|
| Sanchirico, 2019 <sup>76</sup>        | Y | Y | N/A | Y | Y | Y | N/A | Y | Y | N | Y | Y | N/A | N/A | Y | N | Y | Y | Y | Y  | 12 |
| Schrieber, 2018 <sup>77</sup>         | Y | Y | Y   | Y | Y | Y | Y   | Y | Y | Y | Y | Y | N   | Y   | Y | Y | Y | Y | Y | Y  | 18 |
| Settle, 2016 <sup>30</sup>            | Y | Y | N   | Y | N | N | N   | Y | Y | N | Y | Y | N   | N   | Y | Y | Y | N | Y | Y  | 11 |
| Shao, 2018 <sup>78</sup>              | Y | Y | N/A | Y | Y | Y | N/A | Y | Y | N | Y | Y | N/A | N/A | Y | Y | Y | Y | N | NP | 13 |
| Smith, 2015 <sup>79</sup>             | Y | Y | N/A | Y | Y | Y | N/A | Y | Y | Y | Y | Y | N/A | N/A | Y | Y | Y | Y | Y | NR | 13 |
| Solsona, 2017 <sup>80</sup>           | Y | Y | N/A | Y | Y | Y | N/A | Y | Y | N | Y | Y | N/A | N/A | Y | Y | Y | Y | N | Y  | 15 |
| Steinberg, 2010 <sup>36</sup>         | Y | Y | N/A | Y | Y | Y | N/A | Y | Y | Y | Y | Y | N/A | N/A | Y | Y | Y | Y | Y | NP | 12 |
| Stockl, 2010 <sup>81</sup>            | Y | Y | N/A | Y | Y | Y | N/A | Y | Y | Y | Y | Y | N/A | N/A | Y | Y | Y | Y | N | NR | 15 |
| Tan, 2011 <sup>82</sup>               | Y | Y | N/A | Y | Y | Y | N/A | Y | Y | Y | Y | Y | N/A | N/A | Y | Y | Y | Y | Y | NP | 12 |
| Vieira, 2019 <sup>83</sup>            | Y | Y | N/A | Y | Y | N | N/A | Y | Y | Y | Y | Y | N/A | N/A | Y | Y | Y | Y | Y | NR | 12 |
| Warrender-Sparkes, 2016 <sup>84</sup> | Y | Y | N/A | Y | Y | Y | N/A | Y | Y | Y | Y | Y | N/A | N/A | Y | Y | Y | Y | N | Y  | 16 |

|                                 |   |   |     |   |   |   |     |   |   |   |   |   |     |     |   |   |   |   |   |    |    |
|---------------------------------|---|---|-----|---|---|---|-----|---|---|---|---|---|-----|-----|---|---|---|---|---|----|----|
| Williams, 2018 <sup>85</sup>    | Y | Y | N/A | Y | Y | Y | N/A | Y | Y | Y | Y | Y | N/A | N/A | Y | Y | Y | Y | Y | NR | 13 |
| Zecca, 2017 <sup>38</sup>       | Y | Y | N   | Y | Y | Y | N   | Y | Y | Y | Y | Y | N   | N   | Y | Y | Y | Y | Y | Y  | 15 |
| Zhang, 2017 <sup>86</sup>       | Y | Y | N/A | Y | Y | Y | N/A | Y | Y | Y | Y | Y | N/A | N/A | Y | Y | Y | Y | N | Y  | 16 |
| Zhornitskiy, 2015 <sup>87</sup> | N | Y | N   | Y | Y | Y | N   | Y | Y | Y | Y | Y | N/A | N/A | Y | Y | Y | N | N | Y  | 14 |
| Zimmer, 2017 <sup>88</sup>      | Y | Y | Y   | Y | Y | Y | Y   | Y | Y | Y | Y | Y | N   | Y   | Y | Y | Y | Y | Y | Y  | 18 |

---

|                  |                                    |                                    |                     |                       |                                    |                                    |                                     |                                     |                                    |                                     |                                    |                                    |                                        |                                    |                                     |                                    |                                     |                                    |                                      |                                      |
|------------------|------------------------------------|------------------------------------|---------------------|-----------------------|------------------------------------|------------------------------------|-------------------------------------|-------------------------------------|------------------------------------|-------------------------------------|------------------------------------|------------------------------------|----------------------------------------|------------------------------------|-------------------------------------|------------------------------------|-------------------------------------|------------------------------------|--------------------------------------|--------------------------------------|
| <b>TOTAL (%)</b> | <b>Y: 60 (98.4 %); N: 1 (1.6%)</b> | <b>Y: 60 (98.4 %); N: 1 (1.6%)</b> | <b>Y: 8 (13.1%)</b> | <b>Y: 61 (100.0%)</b> | <b>Y: 59 (96.7 %); N: 2 (3.3%)</b> | <b>Y: 56 (91.8 %); N: 5 (8.2%)</b> | <b>Y: 13 (21.3 %); N: 7 (11.5%)</b> | <b>Y: 61 (100.0 %); N: 0 (0.0%)</b> | <b>Y: 58 (95.1 %); N: 3 (4.9%)</b> | <b>Y: 54 (88.5 %); N: 7 (11.5%)</b> | <b>Y: 59 (96.8 %); N: 2 (3.3%)</b> | <b>Y: 59 (96.8 %); N: 2 (3.3%)</b> | <b>N/A: 45 (73.8 %); N: 16 (26.2%)</b> | <b>Y: 12 (19.7 %); N: 4 (6.6%)</b> | <b>Y: 61 (100.0 %); N: 1 (1.6%)</b> | <b>Y: 60 (98.4 %); N: 1 (1.6%)</b> | <b>Y: 61 (100.0 %); N: 1 (1.6%)</b> | <b>Y: 58 (95.1 %); N: 3 (4.9%)</b> | <b>Y: 37 (60.7 %); N: 24 (39.3%)</b> | <b>Y: 38 (62.3 %); N: 23 (37.7%)</b> |
|------------------|------------------------------------|------------------------------------|---------------------|-----------------------|------------------------------------|------------------------------------|-------------------------------------|-------------------------------------|------------------------------------|-------------------------------------|------------------------------------|------------------------------------|----------------------------------------|------------------------------------|-------------------------------------|------------------------------------|-------------------------------------|------------------------------------|--------------------------------------|--------------------------------------|

---

---

Note: For total scores of each question, responses were assigned either a positive value (+1), negative value (-1) or neutral value (0), relative to specific questions. Items 1-12 were coded, Y=1 N=0, N/A=0; Items 13 and 19 were coded, Y=-1; N=1, N/A=0; and item 20 was coded, Y=1, NP=-1, NR=0.

Abbreviations: Y=yes; N=no, N/A=not applicable, NP=not provided, NR=not required.

---

Criteria: 1. Were the aims/objective of the study clear? 2. Was the study design appropriate for the stated aim(s)?; 3. Was the sample size justified?; 4. Was the target/reference population clearly defined? (Is it clear who the research was about?); 5. Was the sample frame taken from an appropriate population base so that it closely represented the target/reference population under investigation?; 6. Was the selection process likely to select subjects/participants that were representative of the target/reference population under investigation?; 7. Were measures undertaken to address and categorize Nonresponders?; 8. Were the risk factor and outcome variables measured appropriate to the aims of the study?; 9. Were the risk factor and outcome variables measured correctly using instruments/measurements that had been trialed, piloted or published previously?; 10. Is it clear what was used to determine statistical significance and/or precision estimates? (eg, *P*-values, CI); 11. Were the methods (including statistical methods) sufficiently described to enable them to be repeated?; 12. Were the basic data adequately described?; 13. Does the response rate raise concerns about Nonresponse bias?; 14. If appropriate, was information about Nonresponders described?; 15. Were the results internally consistent?; 16. Were the results presented for all the analyses described in the methods?; 17. Were the authors' discussions and conclusions justified by the results?; 18. Were the limitations of the study discussed?; 19. Were there any funding sources or conflicts of interest that may affect the authors' interpretation of the results?; 20. Was ethical approval or consent of participants attained?

---

N=61

SUPPLEMENTARY TABLE 5 Sensitivity analysis to check effect of excluding studies with highest weights in meta-analyses

| <b>Excluded study</b>                           | <b>Pooled ES</b> | <b>LCI 95%</b> | <b>HCI 95%</b> | <b>Cochran Q</b> | <b>p</b> | <b>I<sup>2</sup></b> | <b>I<sup>2</sup> LCI 95%</b> | <b>I<sup>2</sup> HCI 95%</b> |
|-------------------------------------------------|------------------|----------------|----------------|------------------|----------|----------------------|------------------------------|------------------------------|
| <b>Mean adherence rate (oral DMTs)</b>          |                  |                |                |                  |          |                      |                              |                              |
| Agashivala, 2013 <sup>41</sup>                  | 0.91             | 0.80           | 1.03           | 765.99           | 0.00     | 99.48                | 99.31                        | 99.61                        |
| Johnson, 2017 <sup>12</sup>                     | 0.91             | 0.75           | 1.08           | 753.13           | 0.00     | 99.47                | 99.29                        | 99.60                        |
| Munsell, 2017 <sup>70</sup>                     | 0.92             | 0.89           | 0.94           | 47.96            | 0.00     | 91.66                | 83.52                        | 95.78                        |
| Vieira, 2019 <sup>83</sup>                      | 0.88             | 0.76           | 1.00           | 584.28           | 0.00     | 99.32                | 99.07                        | 99.50                        |
| Williams, 2018 (Hispanic) <sup>85</sup>         | 0.91             | 0.82           | 1.01           | 761.64           | 0.00     | 99.47                | 99.30                        | 99.60                        |
| Williams, 2018 (African American) <sup>85</sup> | 0.91             | 0.82           | 1.01           | 754.10           | 0.00     | 99.47                | 99.30                        | 99.60                        |
| <b>Mean adherence rate (injectable DMTs)</b>    |                  |                |                |                  |          |                      |                              |                              |
| Agashivala, 2013 <sup>41</sup>                  | 0.72             | 0.63           | 0.81           | 421.87           | 0.00     | 98.58                | 98.03                        | 98.97                        |
| Cerghet, 2010 <sup>44</sup>                     | 0.77             | 0.66           | 0.87           | 1416.17          | 0.00     | 99.58                | 99.47                        | 99.66                        |
| Kleinman, 2010 <sup>61</sup>                    | 0.77             | 0.66           | 0.88           | 1413.11          | 0.00     | 99.58                | 99.47                        | 99.66                        |
| Munsell, 2017 <sup>70</sup>                     | 0.82             | 0.71           | 0.92           | 645.82           | 0.00     | 99.07                | 98.77                        | 99.30                        |
| Steinberg, 2010 <sup>36</sup>                   | 0.78             | 0.64           | 0.92           | 1307.67          | 0.00     | 99.54                | 99.43                        | 99.63                        |
| Stockl, 2010 <sup>81</sup>                      | 0.76             | 0.65           | 0.87           | 1243.25          | 0.00     | 99.52                | 99.40                        | 99.61                        |
| Williams, 2018 (Hispanic) <sup>85</sup>         | 0.77             | 0.66           | 0.87           | 1414.32          | 0.00     | 99.58                | 99.47                        | 99.66                        |
| Williams, 2018 (African American) <sup>85</sup> | 0.77             | 0.66           | 0.87           | 1413.21          | 0.00     | 99.58                | 99.47                        | 99.66                        |
| <b>Mean discontinuation rate (oral DMTs)</b>    |                  |                |                |                  |          |                      |                              |                              |
| Agashivala, 2013 (1st DMT) <sup>41</sup>        | 0.24             | 0.17           | 0.32           | 97.20            | 0.00     | 93.83                | 89.68                        | 96.31                        |
| Agashivala, 2013 (2nd+ DMT) <sup>41</sup>       | 0.24             | 0.17           | 0.32           | 99.72            | 0.00     | 93.98                | 89.98                        | 96.39                        |
| Burks, 2017 <sup>13</sup>                       | 0.26             | 0.19           | 0.33           | 54.47            | 0.00     | 88.98                | 79.78                        | 94.00                        |
| Duquette, 2019 <sup>9</sup>                     | 0.21             | 0.14           | 0.28           | 70.90            | 0.00     | 91.54                | 85.14                        | 95.18                        |
| Munsell, 2017 <sup>70</sup>                     | 0.24             | 0.15           | 0.33           | 91.58            | 0.00     | 93.45                | 88.95                        | 96.12                        |
| Prosperini, 2019 <sup>74</sup>                  | 0.25             | 0.18           | 0.32           | 76.44            | 0.00     | 92.15                | 86.38                        | 95.48                        |
| Warrender-Sparkes, 2016 <sup>84</sup>           | 0.24             | 0.18           | 0.31           | 92.07            | 0.00     | 93.48                | 89.02                        | 96.13                        |

|                            |      |      |      |       |      |       |       |       |
|----------------------------|------|------|------|-------|------|-------|-------|-------|
| Gerber, 2017 <sup>59</sup> | 0.24 | 0.17 | 0.31 | 98.71 | 0.00 | 93.92 | 89.86 | 96.35 |
|----------------------------|------|------|------|-------|------|-------|-------|-------|

---

**Mean discontinuation rate (injectable DMTs)**

---

|                                           |      |      |      |         |      |       |       |       |
|-------------------------------------------|------|------|------|---------|------|-------|-------|-------|
| Agashivala, 2013 (1st DMT) <sup>41</sup>  | 0.26 | 0.19 | 0.34 | 1757.89 | 0.00 | 99.49 | 99.38 | 99.58 |
| Agashivala, 2013 (2nd+ DMT) <sup>41</sup> | 0.26 | 0.19 | 0.34 | 1783.63 | 0.00 | 99.50 | 99.39 | 99.58 |
| Cohan, 2018 <sup>45</sup>                 | 0.27 | 0.20 | 0.35 | 1759.61 | 0.00 | 99.49 | 99.38 | 99.58 |
| Duquette, 2019 <sup>9</sup>               | 0.25 | 0.18 | 0.32 | 1249.17 | 0.00 | 99.28 | 99.11 | 99.42 |
| Evans, 2016 <sup>55</sup>                 | 0.28 | 0.21 | 0.36 | 1505.15 | 0.00 | 99.40 | 99.27 | 99.51 |
| Munsell, 2017 <sup>70</sup>               | 0.27 | 0.18 | 0.35 | 1834.58 | 0.00 | 99.51 | 99.41 | 99.59 |
| Prosperini, 2019 <sup>74</sup>            | 0.27 | 0.19 | 0.34 | 1834.33 | 0.00 | 99.51 | 99.41 | 99.59 |
| Sabido-Espin, 2017 <sup>75</sup>          | 0.28 | 0.20 | 0.36 | 1669.27 | 0.00 | 99.46 | 99.35 | 99.55 |
| Warrender-Sparkes, 2016 <sup>84</sup>     | 0.27 | 0.19 | 0.35 | 1771.92 | 0.00 | 99.49 | 99.39 | 99.58 |
| Smith, 2015 <sup>79</sup>                 | 0.27 | 0.18 | 0.36 | 1834.07 | 0.00 | 99.51 | 99.41 | 99.59 |
| Gerber, 2017 <sup>59</sup>                | 0.25 | 0.19 | 0.32 | 1173.51 | 0.00 | 99.23 | 99.05 | 99.38 |

---

**Adherence as dichotomous outcomes ( $\geq 80\%$  adherence)**

---

| Excluded study                                  | Pooled prevalence | LCI 95% | HCI 95% | Cochran Q | p    | I <sup>2</sup> | I <sup>2</sup> LCI 95% | I <sup>2</sup> HCI 95% |
|-------------------------------------------------|-------------------|---------|---------|-----------|------|----------------|------------------------|------------------------|
| <b>(A) Oral DMT, MPR</b>                        |                   |         |         |           |      |                |                        |                        |
| Agashivala, 2013 <sup>41</sup>                  | 0.79              | 0.59    | 0.95    | 821.04    | 0.00 | 99.39          | 99.21                  | 99.53                  |
| Duquette, 2019 <sup>9</sup>                     | 0.83              | 0.48    | 1.00    | 685.65    | 0.00 | 99.27          | 99.03                  | 99.45                  |
| Gerber, 2017 <sup>59</sup>                      | 0.79              | 0.60    | 0.95    | 832.60    | 0.00 | 99.40          | 99.22                  | 99.54                  |
| Munsell, 2017 <sup>70</sup>                     | 0.82              | 0.66    | 0.95    | 419.59    | 0.00 | 98.81          | 98.34                  | 99.15                  |
| Vieira, 2019 <sup>83</sup>                      | 0.70              | 0.49    | 0.90    | 229.33    | 0.00 | 97.82          | 96.72                  | 98.55                  |
| Williams, 2018 (Hispanic) <sup>85</sup>         | 0.79              | 0.60    | 0.95    | 838.60    | 0.00 | 99.40          | 99.22                  | 99.54                  |
| Williams, 2018 (African American) <sup>85</sup> | 0.79              | 0.60    | 0.95    | 835.49    | 0.00 | 99.40          | 99.22                  | 99.54                  |
| <b>(B) Injectable DMTs, MPR</b>                 |                   |         |         |           |      |                |                        |                        |
| Agashivala, 2013 <sup>41</sup>                  | 0.61              | 0.49    | 0.72    | 808.54    | 0.00 | 99.26          | 99.04                  | 99.43                  |



|                                                 |      |      |      |         |      |       |       |       |
|-------------------------------------------------|------|------|------|---------|------|-------|-------|-------|
| Degli Esposti, 2017 <sup>40</sup>               | 0.62 | 0.49 | 0.74 | 1001.64 | 0.00 | 99.40 | 99.24 | 99.53 |
| Duquette, 2019 <sup>9</sup>                     | 0.64 | 0.53 | 0.75 | 718.53  | 0.00 | 99.16 | 98.90 | 99.36 |
| Evans, 2017 <sup>54</sup>                       | 0.58 | 0.47 | 0.69 | 524.35  | 0.00 | 98.86 | 98.45 | 99.15 |
| Gerber, 2017 <sup>59</sup>                      | 0.62 | 0.48 | 0.75 | 1008.16 | 0.00 | 99.40 | 99.24 | 99.53 |
| Munsell, 2017 <sup>70</sup>                     | 0.66 | 0.55 | 0.77 | 716.79  | 0.00 | 99.16 | 98.90 | 99.36 |
| Williams, 2018 (Hispanic) <sup>85</sup>         | 0.62 | 0.51 | 0.73 | 1007.81 | 0.00 | 99.40 | 99.24 | 99.53 |
| Williams, 2018 (African American) <sup>85</sup> | 0.62 | 0.51 | 0.73 | 1008.19 | 0.00 | 99.40 | 99.24 | 99.53 |

---

**(C) Oral DMTs, PDC**

---

|                                                 |      |      |      |         |      |       |       |       |
|-------------------------------------------------|------|------|------|---------|------|-------|-------|-------|
| Agashivala, 2013 <sup>41</sup>                  | 0.80 | 0.51 | 1.00 | 2586.91 | 0.00 | 99.81 | 99.77 | 99.84 |
| Burks, 2017 <sup>13</sup>                       | 0.81 | 0.50 | 1.00 | 2413.68 | 0.00 | 99.79 | 99.75 | 99.83 |
| Johnson, 2017 <sup>12</sup>                     | 0.82 | 0.48 | 1.00 | 2356.84 | 0.00 | 99.79 | 99.75 | 99.82 |
| Sanchirico, 2019 <sup>76</sup>                  | 0.61 | 0.58 | 0.65 | 14.25   | 0.01 | 64.91 | 15.58 | 85.41 |
| Vieira, 2019 <sup>83</sup>                      | 0.87 | 0.54 | 1.00 | 1353.78 | 0.00 | 99.63 | 99.54 | 99.70 |
| Williams, 2018 (Hispanic) <sup>85</sup>         | 0.80 | 0.52 | 1.00 | 2597.14 | 0.00 | 99.81 | 99.77 | 99.84 |
| Williams, 2018 (African American) <sup>85</sup> | 0.80 | 0.52 | 1.00 | 2589.98 | 0.00 | 99.81 | 99.77 | 99.84 |

---

**(D) Injectable DMTs, PDC**

---

|                                                 |      |      |      |         |      |       |       |       |
|-------------------------------------------------|------|------|------|---------|------|-------|-------|-------|
| Agashivala, 2013 <sup>41</sup>                  | 0.82 | 0.71 | 0.91 | 718.98  | 0.00 | 99.30 | 99.08 | 99.47 |
| Evans, 2016 <sup>55</sup>                       | 0.81 | 0.61 | 0.97 | 1405.08 | 0.00 | 99.64 | 99.56 | 99.71 |
| Melesse, 2017 <sup>35</sup>                     | 0.80 | 0.65 | 0.92 | 1444.73 | 0.00 | 99.65 | 99.57 | 99.72 |
| Sanchirico, 2019 <sup>76</sup>                  | 0.73 | 0.60 | 0.85 | 526.28  | 0.00 | 99.05 | 98.70 | 99.30 |
| Shao, 2018 <sup>78</sup>                        | 0.81 | 0.61 | 0.97 | 1391.49 | 0.00 | 99.64 | 99.55 | 99.71 |
| Williams, 2018 (Hispanic) <sup>85</sup>         | 0.80 | 0.66 | 0.92 | 1408.76 | 0.00 | 99.65 | 99.56 | 99.72 |
| Williams, 2018 (African American) <sup>85</sup> | 0.80 | 0.67 | 0.92 | 1372.99 | 0.00 | 99.64 | 99.54 | 99.71 |

---

SUPPLEMENTARY FIGURE 1 Forest plot showing pooled estimates for the proportion of sample oral and injectable DMTs showing adherence of more than 80%, with separate subgroups for MPR and PDC

**Oral DMTs MPR**

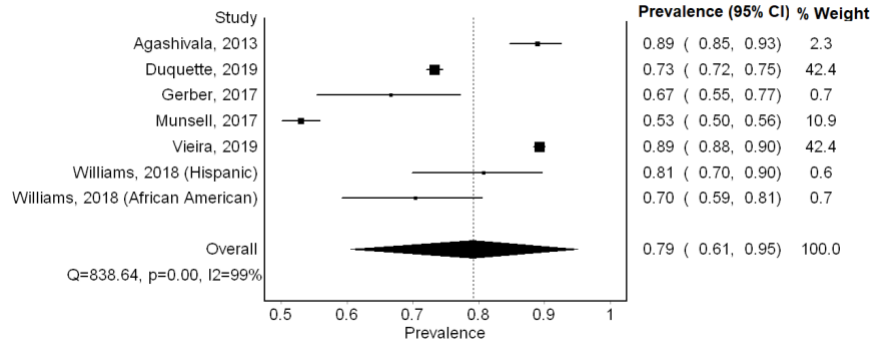

**Oral DMTs PDC**

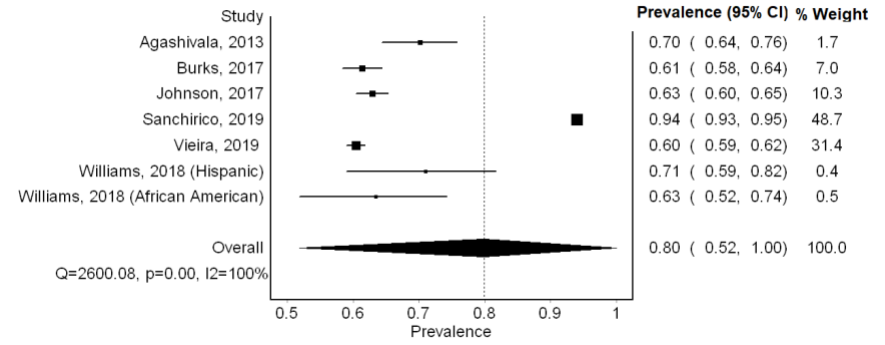

**Injectable DMTs MPR**

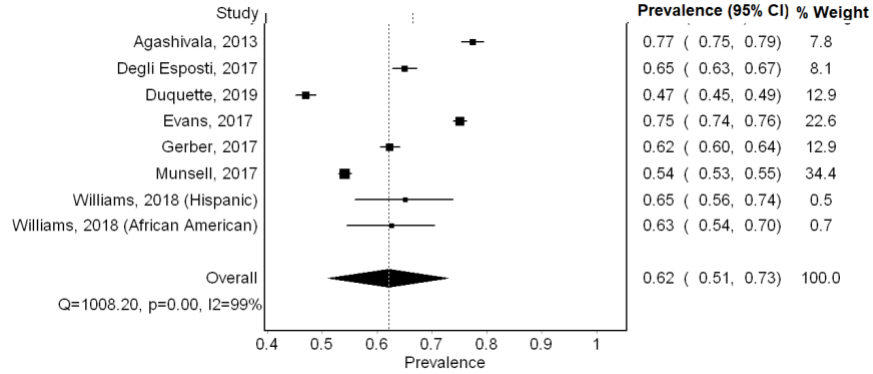

**Injectable DMTs PDC**

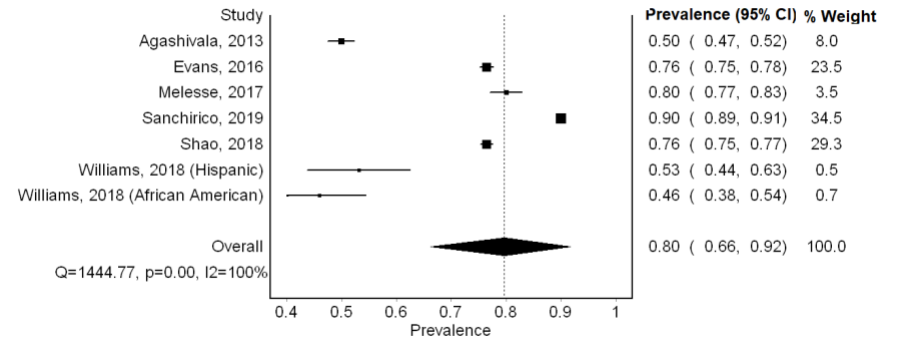

SUPPLEMENTARY FIGURE 2 Doi plot showing major asymmetry between all studies

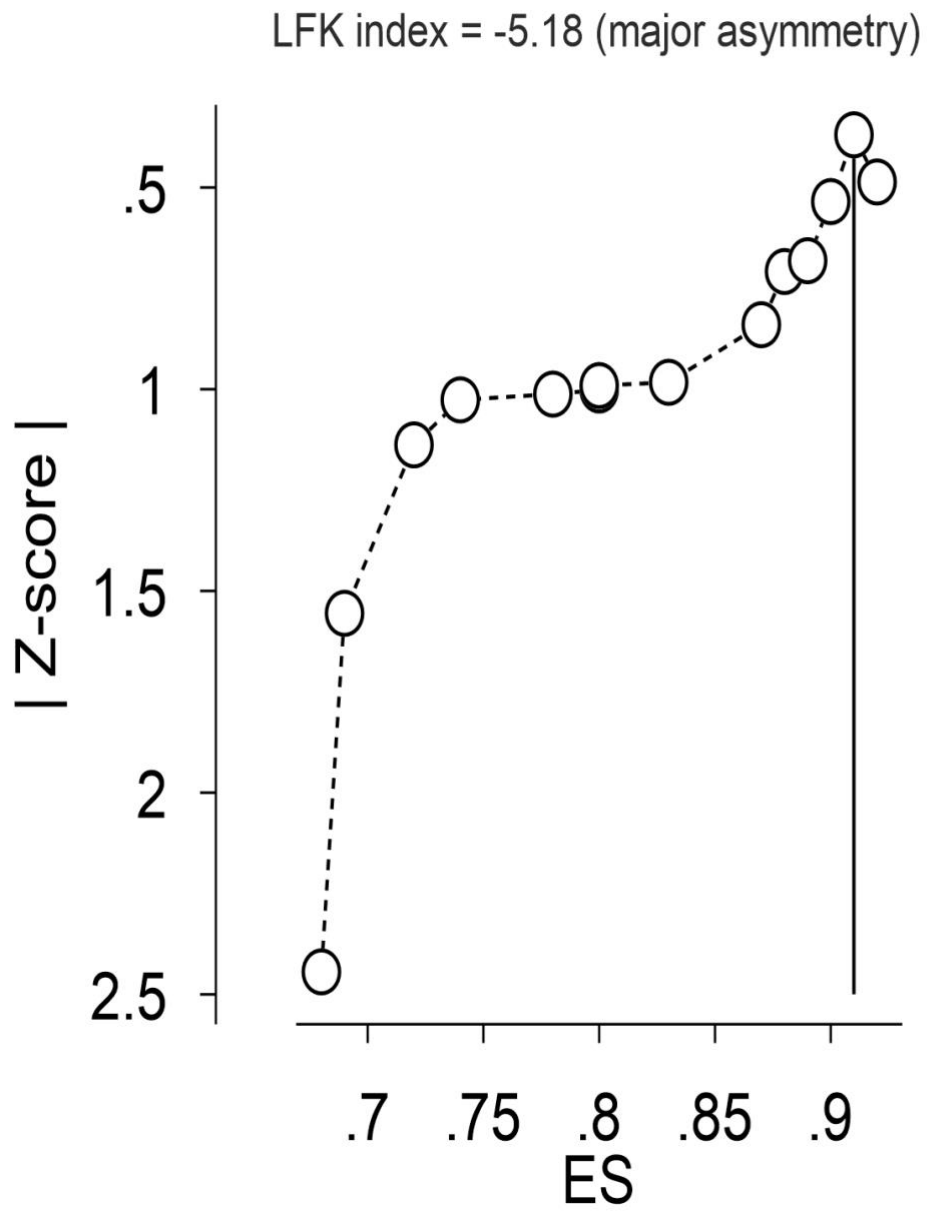

Supplement: jmcp.2021.27.9.1273_s001.pdf [file jmcp.2021.27.9.1273_s001.pdf]
